# Supplementary material for: Medicinal plant acid-treatment for a healthier herb tea and recycling of the spent herb residue
Source: Royal Society of Chemistry journal article supplement (doi:10.1039/c2ra20429k), 2012-01-01
Supplement: c2ra20429k.pdf [file c2ra20429k.pdf]

## **Electronic Supplementary Information (ESI)**

### **Medicinal plant acid-treatment for a healthier herb tea and recycling of the spent herb residue**

Hong-Wen Gao, Dong-Dong Ma and Gang Xu

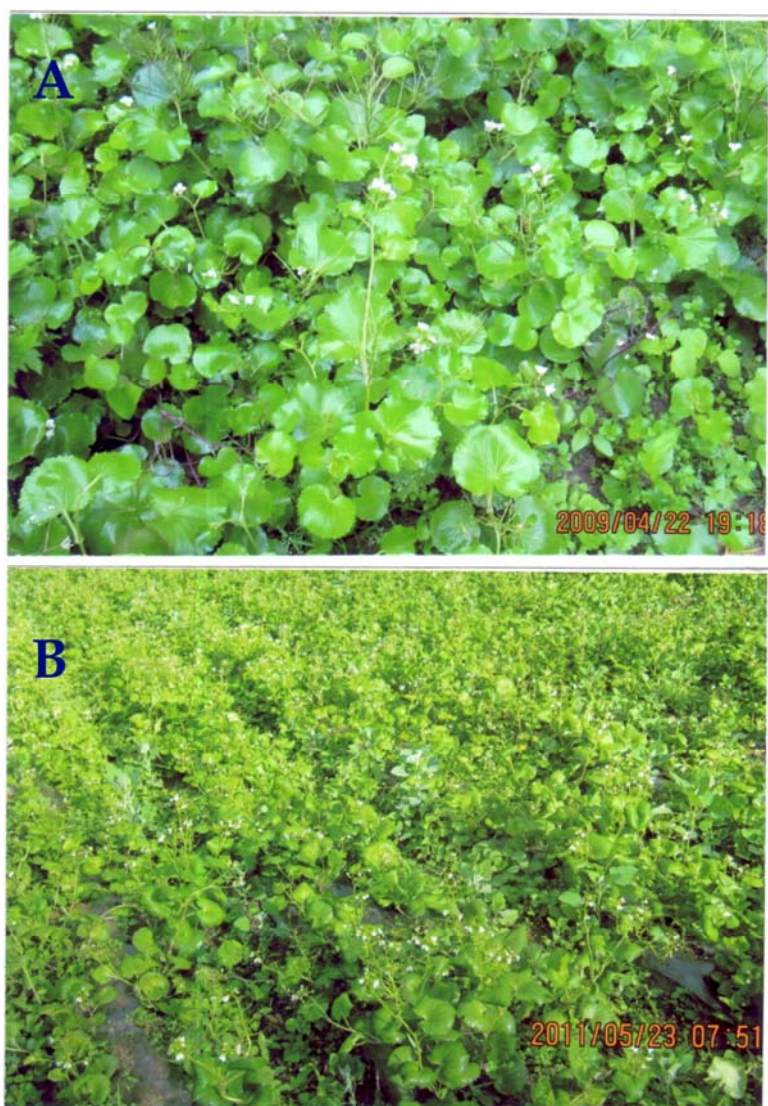

**Figure S1** The *T. rotundifolium* herb plantation at Shuanghe Yutangba village of Xintang Town in Enshi Region of China.

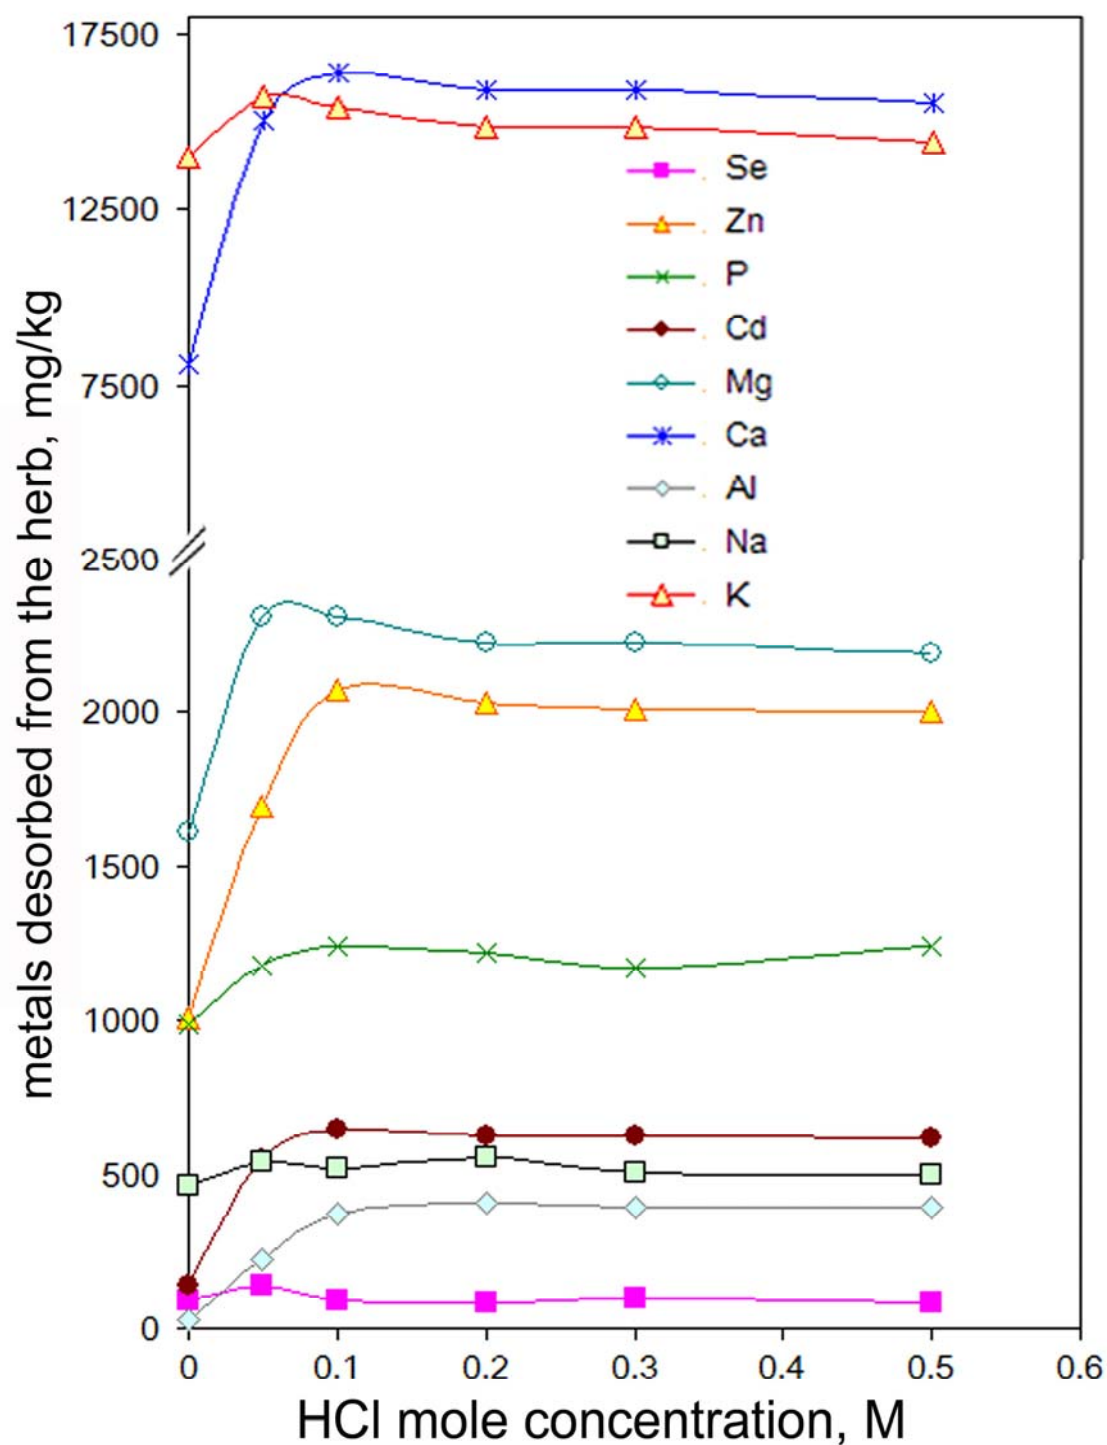

**Figure S2** Effect of hydrochloric acid molarity on elimination of metals from the raw *T. rotundifolium* (5%). The desorption of various metals approached equilibrium when hydrochloric acid is more than 0.1 M.

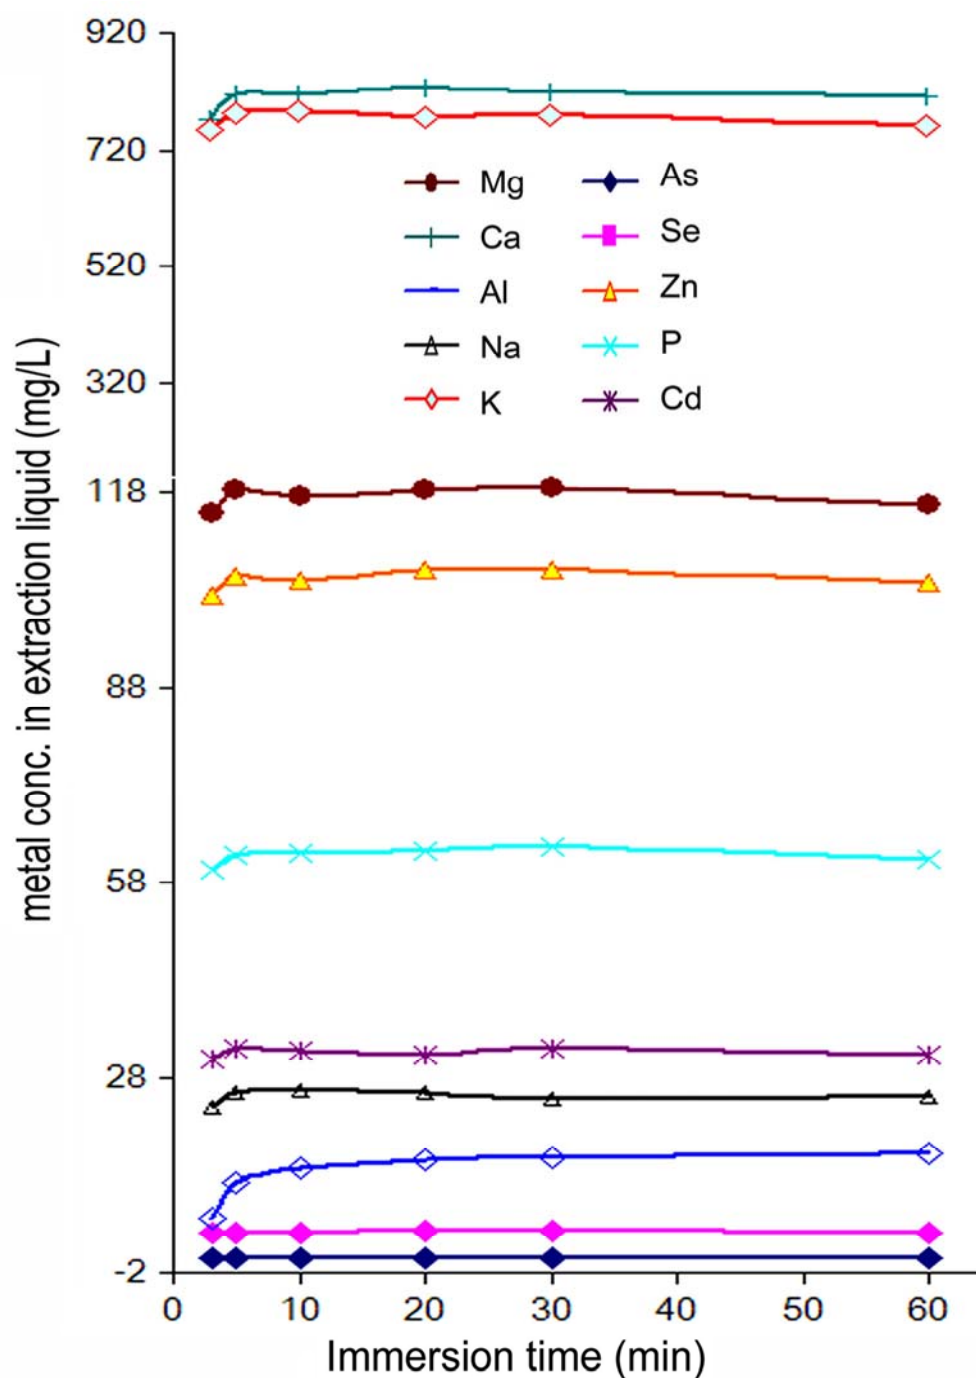

**Figure S3** Effect of immersion time on elimination of metals from *T. rotundifolium* treated with 0.1 M hydrochloric acid. The desorption of various metals approached equilibrium when the raw herb (5%) was immersed in 0.1 M hydrochloric acid and mixed for more than 5 min at room temperature.

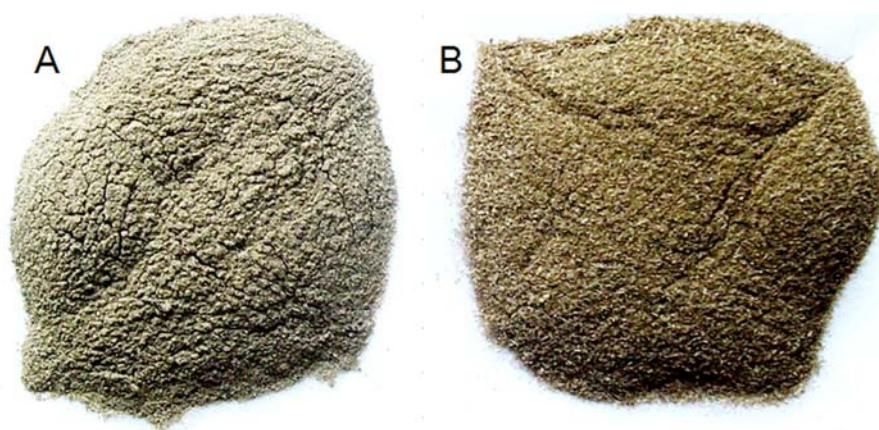

**Figure S4** Photographs of raw (A) and acid-treating (B) *T. rotundifolium*. powder

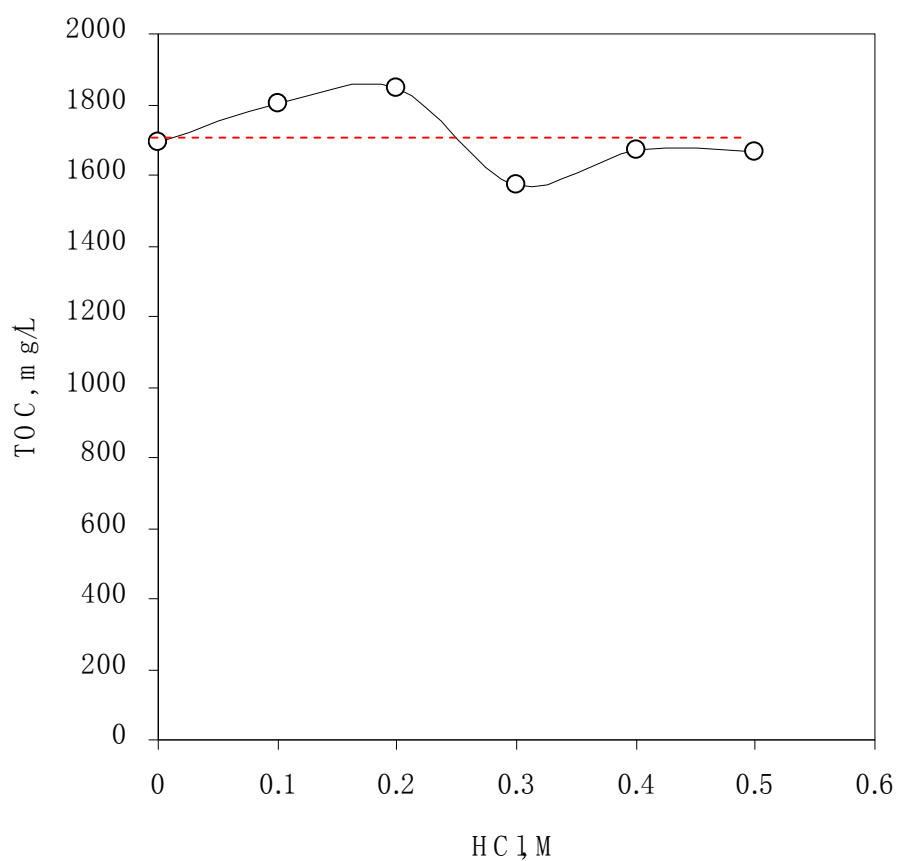

**Figure S5** - Release of TOC from the raw *T. rotundifolium* (5%) immersing in deionized water and hydrochloric acid solutions for 10 min at room temperature. It indicated that the release amount of organic substances is almost same wherever in deionized water or diluted acids. Absolutely, the diluted acid as the metals-extracting agent to treat the herb will not bring out an obvious loss of organic components including BACs in the herb.



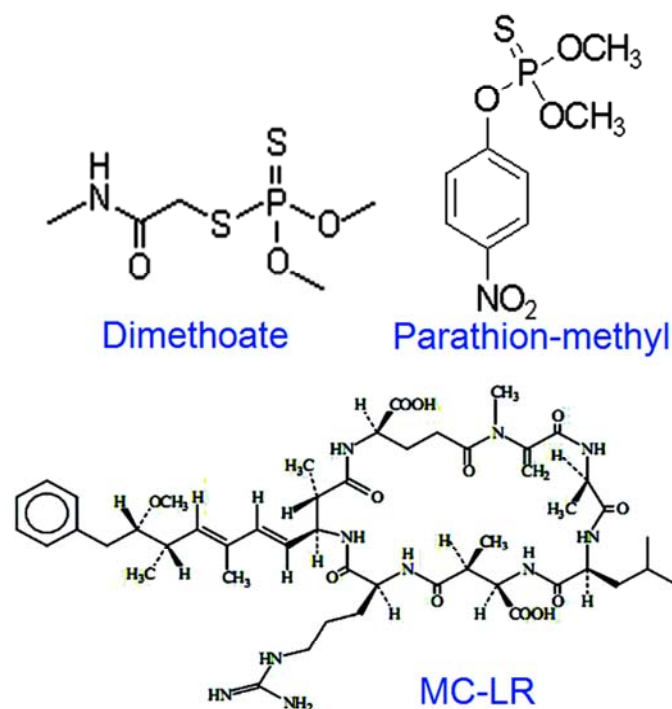

**Figure S6** Chemical structure of dimethoate, parathion-methyl and MC-LR.

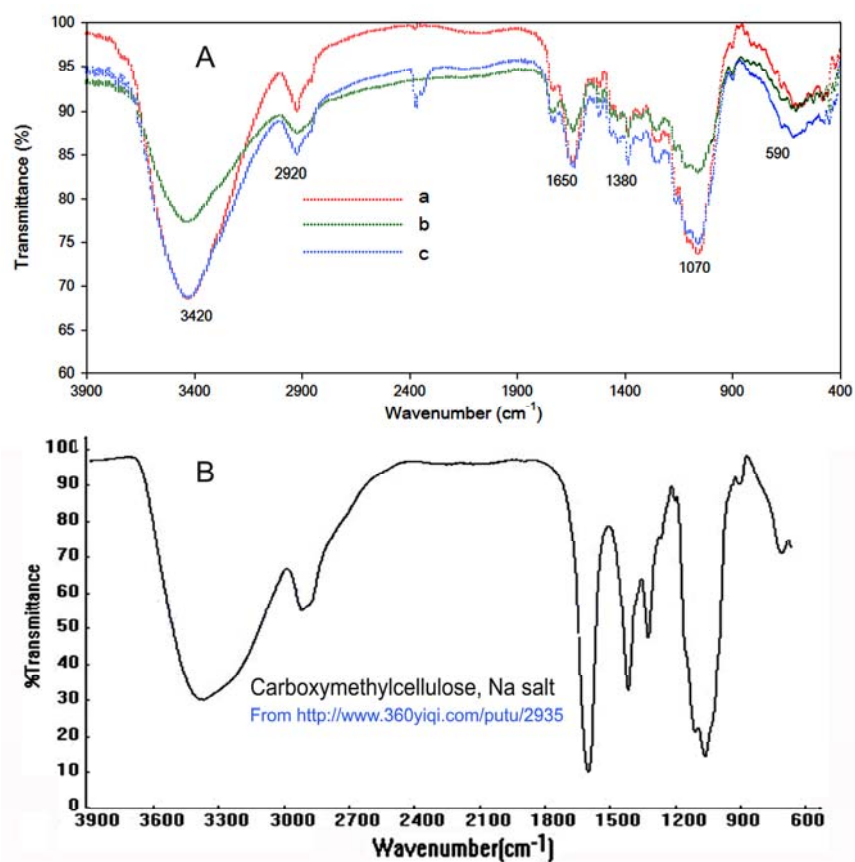

**Figure S7** IR spectra of the herbs. **A a:** raw herb, **b:** acid-treated herb and **c:** the same as b but metals adsorbed on. **B:** IR of carboxymethylcellulose from an IR data bank, it was used to compare with **A**.
